# Supplementary material for: Different approaches for estimation of the expanded uncertainty of an analytical method developed for determining pharmaceutical active compounds in wastewater using solid-phase extraction and a liquid chromatography coupled with tandem mass spectrometry method
Source: Royal Society of Chemistry journal article supplement (doi:10.1039/d2ay01676a), 2022-11-28
Supplement: d2ay01676a1.pdf [file d2ay01676a1.pdf]

## Different approaches for estimation of expanded uncertainty of an analytical method developed for determining pharmaceutical active compounds in wastewater using solid-phase extraction and liquid chromatography coupled with tandem mass spectrometry method

João A. Rodrigues,<sup>a</sup> Sofia Silva,<sup>a</sup> Vitor Vale Cardoso,<sup>a</sup> Maria João Benoliel<sup>a</sup> and Cristina M. M. Almeida<sup>\*b,c</sup>

### Supplementary Material

|                  |                                                                                                                                                                                                                             |
|------------------|-----------------------------------------------------------------------------------------------------------------------------------------------------------------------------------------------------------------------------|
| <b>Table S1</b>  | Preliminary concentration range for the study of PhACs linearity and respective instrumental analytical thresholds                                                                                                          |
| <b>Table S2</b>  | PhACs linearity range studies and respective instrumental analytical thresholds – low concentration range                                                                                                                   |
| <b>Table S3</b>  | PhACs linearity range studies and respective instrumental analytical thresholds – medium concentration range (reported LOD and LOQ for medium linear range)                                                                 |
| <b>Table S4</b>  | PhACs linearity range studies and respective instrumental analytical thresholds – high concentration range (reported LOD and LOQ for high linear range)                                                                     |
| <b>Table S5</b>  | Working range of standard addition calibration curve of PhACs in BEI WWI by SPE-UHPLC-MS/MS                                                                                                                                 |
| <b>Table S6</b>  | Working range of standard addition calibration curve of PhACs in BEI WWE by SPE-UHPLC-MS/MS                                                                                                                                 |
| <b>Table S7</b>  | Working range of standard addition calibration curve of PhACs in FNw WWI by SPE-UHPLC-MS/MS                                                                                                                                 |
| <b>Table S8</b>  | Working range of standard addition calibration curve of PhACs in FNw WWE by SPE-UHPLC-MS/MS                                                                                                                                 |
| <b>Table S9</b>  | Limits of detection (LOD) and limits of quantification (LOQ) for target PhACS determined based on calibration curve and repeatability conditions for influent (BEI WWI) and effluent (BEI WWE) wastewaters of Beirolas WWTP |
| <b>Table S10</b> | Limits of detection (LOD) and limits of quantification (LOQ) for target PhACS determined based on calibration curve and repeatability conditions for influent (FNw WWI) and effluent (FNw WWE) wastewaters of Faro NW WWTP  |
| <b>Table S11</b> | Absolute recovery of PhACs in influent and effluent wastewater of Beirolas WWTP by SPE-UHPLC-MS/MS                                                                                                                          |
| <b>Table S12</b> | Absolute recovery of PhACs in influent and effluent wastewater of Faro NW WWTP by SPE-UHPLC-MS/MS                                                                                                                           |
| <b>Table S13</b> | Precision of the SPE-UHPLC-MS/MS method at two concentration levels (n = 10) under repeatability conditions                                                                                                                 |
| <b>Table S14</b> | Individual uncertainty components and respective expanded uncertainty estimated in the analysis of the 24 PhACs in wastewater influents from Beirolas WWTP by SPE-UHPLC-MS/MS.                                              |
| <b>Table S15</b> | Individual uncertainty components and respective expanded uncertainty estimated in the analysis of the 24 PhACs in wastewater effluents from Beirolas WWTP by SPE-UHPLC-MS/MS.                                              |
| <b>Table S16</b> | Individual uncertainty components and respective expanded uncertainty estimated in the analysis of the 24 PhACs in wastewater influents from Faro NW WWTP by SPE-UHPLC-MS/MS.                                               |
| <b>Table S17</b> | Individual uncertainty components and respective expanded uncertainty estimated in the analysis of the 24 PhACs in wastewater effluents from Faro Nw WWTP by SPE-UHPLC-MS/MS.                                               |

**Table S1.** Preliminary concentration range for the study of PhACs linearity and respective instrumental analytical thresholds

| PhACs | N  | C<br>µg/L | r <sup>2</sup> | CV <sub>m</sub><br>(%) | Norm<br>(%)<br>[85-115] | Residues<br>(%)<br>[85-115] | RIKILT<br>(%)<br>[90-110] | Mandel test<br>PG ≤ F<br>(0,05; 1; N-3) | LOD<br>µg/L | LOQ<br>µg/L |
|-------|----|-----------|----------------|------------------------|-------------------------|-----------------------------|---------------------------|-----------------------------------------|-------------|-------------|
| ATN   | 24 | 0.4 – 749 | 0.9958         | 10.3                   | [93-134]                | [-94; 17]                   | [82-118]                  | 131.7 ≥ 4.3                             | 44.5        | 148.5       |
| APAP  | 24 | 0.3 – 717 | 0.9697         | 28.9                   | [100-302]               | [-96; 44]                   | [45-137]                  | 136.2 ≥ 4.3                             | 114.4       | 381.4       |
| SDZ   | 24 | 0.4 – 734 | 0.9972         | 8.5                    | [92-157]                | [-93; 15]                   | [74-126]                  | 104.8 ≥ 4.3                             | 35.9        | 119.5       |
| SPD   | 24 | 0.4 – 739 | 0.9936         | 12.7                   | [99-176]                | [-95; 22]                   | [70-123]                  | 72.9 ≥ 4.3                              | 54.1        | 180.3       |
| CAF   | 24 | 0.4 – 744 | 0.9979         | 7.3                    | [76-118]                | [-97; 10]                   | [87-135]                  | 138.3 ≥ 4.3                             | 31.5        | 104.9       |
| SMX   | 24 | 0.4 – 735 | 0.9994         | 3.8                    | [90-102]                | [-85; 5]                    | [95-109]                  | 27.3 ≥ 4.3                              | 16.2        | 54.1        |
| MTPL  | 24 | 0.4 – 728 | 0.9924         | 13.9                   | [89-142]                | [-95; 20]                   | [75-121]                  | 259.1 ≥ 4.3                             | 58.2        | 194.2       |
| PPNL  | 24 | 0.4 – 714 | 0.9943         | 12.0                   | [90-127]                | [-96; 18]                   | [80-112]                  | 173.7 ≥ 4.3                             | 49.4        | 164.7       |
| CTS   | 24 | 0.4 – 744 | 0.9968         | 8.9                    | [83-127]                | [-93; 12]                   | [84-129]                  | 255.7 ≥ 4.3                             | 38.5        | 128.2       |
| CBZ   | 24 | 0.4 – 730 | 0.9939         | 12.5                   | [93-144]                | [-95; 17]                   | [74-115]                  | 353.2 ≥ 4.3                             | 52.4        | 174.7       |
| CFA   | 19 | 3.3 – 722 | 0.9989         | 4.5                    | [92-115]                | [-11703;400]                | [91-113]                  | 123.9 ≥ 4.5                             | 23.8        | 79.2        |
| NPX   | 24 | 0.4 – 717 | 0.9968         | 9.0                    | [74-118]                | [-93; 39]                   | [84-106]                  | 49.1 ≥ 4.3                              | 37.1        | 123.6       |
| GTD   | 22 | 1.6 – 731 | 0.9960         | 9.5                    | [96-118]                | [-78; 118]                  | [82-115]                  | 401.8 ≥ 4.4                             | 43.7        | 145.8       |
| TTE   | 23 | 0.6 – 753 | 0.9983         | 6.3                    | [84-120]                | [-85; 118]                  | [88-124]                  | 74.2 ≥ 4.4                              | 28.7        | 95.5        |
| BZF   | 24 | 0.4 – 665 | 0.9997         | 3.1                    | [91-115]                | [-533; 2442]                | [87-108]                  | 0.0 ≥ 4.3                               | 10.9        | 36.4        |
| IBUP  | 22 | 0.6 – 646 | 0.9978         | 7.3                    | [81-103]                | [-11; 83]                   | [89-111]                  | 1.8 ≤ 4.4                               | 27.2        | 90.7        |
| DCF   | 24 | 0.4 – 687 | 0.9951         | 11.7                   | [94-138]                | [-95; 16]                   | [77-110]                  | 321.2 ≥ 4.3                             | 42.4        | 141.3       |
| E3    | 22 | 0.6 – 603 | 0.9989         | 5.2                    | [91-113]                | [-9; 120]                   | [89-110]                  | 0.01 ≤ 4.4                              | 18.0        | 60.1        |
| E1    | 22 | 0.6 – 610 | 0.9985         | 6.2                    | [98-121]                | [-82; 7]                    | [88-109]                  | 38.8 ≥ 4.4                              | 21.8        | 72.5        |
| E2    | 22 | 0.6 – 603 | 0.9971         | 8.5                    | [97-148]                | [-86; 7]                    | [78-119]                  | 104.5 ≥ 4.4                             | 29.4        | 98.0        |
| EE2   | 21 | 1.6 – 605 | 0.9980         | 6.9                    | [82-135]                | [-74; 14]                   | [81-134]                  | 135.0 ≥ 4.4                             | 24.9        | 83.0        |
| DES   | 22 | 0.6 – 611 | 0.9946         | 11.6                   | [89-128]                | [-89; 11]                   | [80-115]                  | 19.3 ≥ 4.4                              | 40.8        | 136.0       |
| ERT   | 19 | 0.4 – 643 | 0.9862         | 22.4                   | [31-526]                | [-93; 24]                   | [11-180]                  | 39.1 ≥ 4.5                              | 63.0        | 210.1       |
| FLX   | 21 | 0.4 – 655 | 0.9980         | 7.5                    | [49-154]                | [-451; 617]                 | [43-136]                  | 52.2 ≥ 4.4                              | 23.6        | 78.8        |

**Table S2.** PhACs linearity range studies and respective instrumental analytical thresholds – low concentration range

| PhACs | N | C<br>µg/L  | r <sup>2</sup> | CV <sub>m</sub><br>(%) | Norm (%)<br>[85-115] | Residues<br>(%)<br>[85-115] | RIKILT<br>(%)<br>[90-110] | Mandel test<br>PG ≤ F<br>(0,05; 1; N-<br>3) | LOD<br>µg/L | LOQ<br>µg/L |
|-------|---|------------|----------------|------------------------|----------------------|-----------------------------|---------------------------|---------------------------------------------|-------------|-------------|
| ATN   | 8 | 1.5 – 9.2  | 0.9998         | 0.76                   | [98-107]             | [-0.9; 1.2]                 | [97-106]                  | 0.16 ≤ 6.61                                 | 0.11        | 0.37        |
| APAP  | 8 | 1.6 – 9.6  | 0.9995         | 1.36                   | [98-107]             | [-3.0; 4.5]                 | [96-105]                  | 1.99 ≤ 6.61                                 | 0.20        | 0.68        |
| SDZ   | 8 | 1.6 – 9.4  | 0.9992         | 1.73                   | [95-104]             | [-2.7; 1.9]                 | [96-105]                  | 1.25 ≤ 6.61                                 | 0.25        | 0.84        |
| SPD   | 8 | 1.5 – 9.2  | 0.9994         | 1.50                   | [95-106]             | [-4.0; 1.4]                 | [95-106]                  | 1.11 ≤ 6.61                                 | 0.22        | 0.72        |
| CAF   | 8 | 1.6 – 9.4  | 0.9993         | 1.58                   | [96-100]             | [-1.6; 4.0]                 | [98-103]                  | 4.15 ≤ 6.61                                 | 0.23        | 0.78        |
| SMX   | 8 | 1.6 – 9.6  | 0.9987         | 2.18                   | [96-101]             | [-2.0; 2.2]                 | [97-102]                  | 0.79 ≤ 6.61                                 | 0.33        | 1.09        |
| MTPL  | 8 | 1.6 – 9.4  | 0.9984         | 2.38                   | [96-111]             | [-3.2; 5.7]                 | [92-106]                  | 4.91 ≤ 6.61                                 | 0.35        | 1.16        |
| PPNL  | 8 | 1.6 – 9.3  | 0.9992         | 1.69                   | [98-114]             | [-3.9; 2.6]                 | [91-106]                  | 0.61 ≤ 6.61                                 | 0.25        | 0.82        |
| CTS   | 8 | 1.5 – 9.2  | 0.9994         | 1.45                   | [98-103]             | [-3.1; 1.8]                 | [98-103]                  | 6.02 ≤ 6.61                                 | 0.21        | 0.69        |
| CBZ   | 8 | 1.6 – 9.5  | 0.9997         | 1.00                   | [96-103]             | [-2.0; 1.4]                 | [97-104]                  | 4.91 ≤ 6.61                                 | 0.15        | 0.49        |
| CFA   | 8 | 9.3 – 55.5 | 0.9986         | 2.24                   | [94-101]             | [-2.9; 5.3]                 | [97-104]                  | 0.47 ≤ 6.61                                 | 1.95        | 6.49        |
| NPX   | 8 | 1.7 – 10.2 | 0.9997         | 1.02                   | [97-103]             | [-1.4; 2.4]                 | [96-102]                  | 2.29 ≤ 6.61                                 | 0.16        | 0.54        |
| GTD   | 8 | 1.6 – 9.7  | 0.9984         | 2.36                   | [92-105]             | [-4.3; 8.4]                 | [95-108]                  | 4.92 ≤ 6.61                                 | 0.36        | 1.19        |
| TTE   | 8 | 1.6 – 9.5  | 0.9997         | 0.98                   | [94-108]             | [-1.7; 2.4]                 | [92-105]                  | 6.35 ≤ 6.61                                 | 0.15        | 0.48        |
| BZF   | 9 | 1.7 – 10.0 | 0.9999         | 0.66                   | [100-104]            | [-2.2; 1.4]                 | [97-101]                  | 0.36 ≤ 5.99                                 | 0.10        | 0.33        |
| IBUP  | 9 | 3.2 – 19.4 | 0.9999         | 0.70                   | [100-103]            | [-1.7; 0.9]                 | [98-101]                  | 4.78 ≤ 5.99                                 | 0.20        | 0.67        |
| DCF   | 9 | 1.7 – 10.3 | 0.9998         | 0.84                   | [94-108]             | [-0.8; 1.1]                 | [92-106]                  | 0.66 ≤ 5.99                                 | 0.13        | 0.43        |
| E3    | 9 | 9.4 – 56.6 | 0.9998         | 0.79                   | [97-103]             | [-0.8; 1.1]                 | [97-103]                  | 5.81 ≤ 5.99                                 | 0.67        | 2.22        |
| E1    | 9 | 8.6 – 51.4 | 0.9997         | 1.00                   | [100-104]            | [-1.5; 2.2]                 | [98-102]                  | 0.08 ≤ 5.99                                 | 0.76        | 2.53        |
| E2    | 9 | 8.7 – 51.9 | 0.9995         | 1.36                   | [94-102]             | [-1.7; 3.1]                 | [96-105]                  | 1.53 ≤ 5.99                                 | 1.04        | 3.48        |
| EE2   | 9 | 8.5 – 50.9 | 0.9990         | 1.89                   | [95-105]             | [-3.4; 2.8]                 | [96-105]                  | 0.16 ≤ 5.99                                 | 1.42        | 4.75        |
| DES   | 9 | 9.0 – 54.0 | 0.9994         | 1.54                   | [98-107]             | [-4.8; 2.8]                 | [94-103]                  | 0.07 ≤ 5.99                                 | 1.23        | 4.11        |
| ERT   | 7 | 1.6 – 9.6  | 0.9990         | 2.26                   | [100-104]            | [-2.4; 3.2]                 | [98-102]                  | 2.09 ≤ 7.71                                 | 0.31        | 1.04        |
| FLX   | 6 | 1.6 – 9.8  | 0.9998         | 0.89                   | [97-111]             | [-1.4; 3.7]                 | [91-105]                  | 3.0 ≤ 10.13                                 | 0.15        | 0.51        |

**Table S3.** PhACs linearity range studies and respective instrumental analytical thresholds – medium concentration range (reported LOD and LOQ for medium linear range)

| PhACs | N | C<br>µg/L    | r <sup>2</sup> | CV <sub>m</sub><br>(%) | Norm (%)<br>[85-115] | Residues<br>(%)<br>[85-115] | RIKILT<br>(%)<br>[90-110] | Mandel test<br>PG ≤<br>F(0,05; 1;<br>N-3) | LOD<br>µg/L | LOQ<br>µg/L |
|-------|---|--------------|----------------|------------------------|----------------------|-----------------------------|---------------------------|-------------------------------------------|-------------|-------------|
| ATN   | 7 | 12.8 – 107.0 | 0.9998         | 1.14                   | [97-101]             | [-2.6; 2.3]                 | [98-102]                  | 0.30 ≤ 7.71                               | 1.7         | 5.8         |
| APAP  | 7 | 16.4 – 102.4 | 1.0000         | 0.31                   | [79-111]             | [-0.4; 0.4]                 | [93-113]                  | 0.34 ≤ 10.13                              | 0.51        | 1.7         |
| SDZ   | 7 | 12.6 – 104.9 | 0.9996         | 1.51                   | [100-108]            | [-2.5; 3.9]                 | [97-105]                  | 0.09 ≤ 7.71                               | 2.3         | 7.5         |
| SPD   | 7 | 12.7 – 105.5 | 0.9995         | 1.69                   | [99-106]             | [-4.2; 2.0]                 | [96-103]                  | 0.50 ≤ 7.71                               | 2.5         | 8.5         |
| CAF   | 7 | 12.8 – 106.3 | 0.9998         | 1.13                   | [96-103]             | [-2.4; 2.8]                 | [97-103]                  | 1.01 ≤ 7.71                               | 1.7         | 5.7         |
| SMX   | 7 | 12.6 – 105.0 | 0.9997         | 1.26                   | [95-102]             | [-1.5; 1.1]                 | [96-103]                  | 0.77 ≤ 7.71                               | 1.9         | 6.3         |
| MTPL  | 7 | 12.5 – 104.0 | 0.9999         | 0.78                   | [99-103]             | [-2.3; 1.0]                 | [98-102]                  | 4.63 ≤ 7.71                               | 1.2         | 3.8         |
| PPNL  | 7 | 12.2 – 102.0 | 0.9995         | 1.79                   | [97-100]             | [-3.8; 2.7]                 | [99-102]                  | 4.28 ≤ 7.71                               | 2.6         | 8.7         |
| CTS   | 7 | 12.8 – 106.3 | 0.9998         | 1.22                   | [99-103]             | [-2.6; 1.8]                 | [98-102]                  | 3.43 ≤ 7.71                               | 1.8         | 6.2         |
| CBZ   | 7 | 12.5 – 104.3 | 0.9998         | 1.00                   | [97-105]             | [-1.5; 1.2]                 | [97-105]                  | 0.60 ≤ 7.71                               | 1.5         | 5.0         |
| CFA   | 5 | 25.8 – 103.2 | 0.9998         | 0.77                   | [100-103]            | [-0.9; 1.1]                 | [99-101]                  | 0.16 ≤ 18.51                              | 1.4         | 4.8         |
| NPX   | 7 | 12.3 – 102.4 | 0.9997         | 1.31                   | [95-101]             | [-2.0; 3.1]                 | [97-103]                  | 0.64 ≤ 7.71                               | 1.9         | 6.4         |
| GTD   | 7 | 12.5 – 104.4 | 0.9999         | 0.66                   | [98-103]             | [-0.8; 1.0]                 | [98-103]                  | 6.54 ≤ 7.71                               | 1.0         | 3.3         |
| TTE   | 7 | 12.9 – 107.6 | 0.9999         | 0.64                   | [97-102]             | [-2.7; 2.7]                 | [98-103]                  | 0.09 ≤ 7.71                               | 1.0         | 3.3         |
| BZF   | 7 | 13.3 – 110.8 | 0.9996         | 1.49                   | [99-107]             | [-2.1; 2.3]                 | [95-103]                  | 0.00 ≤ 7.71                               | 2.4         | 7.8         |
| IBUP  | 7 | 12.9 – 107.6 | 0.9995         | 1.74                   | [97-109]             | [-2.4; 3.0]                 | [93-105]                  | 12.74 ≤ 7.71                              | 2.7         | 8.9         |
| DCF   | 7 | 13.7 – 114.4 | 0.9996         | 1.55                   | [97-108]             | [-4.6; 1.9]                 | [95-106]                  | 0.12 ≤ 7.71                               | 2.5         | 8.4         |
| E3    | 5 | 25.1 – 100.6 | 0.9994         | 1.42                   | [94-103]             | [-1.3; 1.8]                 | [97-106]                  | 1.51 ≤ 18.51                              | 2.6         | 8.7         |
| E1    | 5 | 25.4 – 101.6 | 0.9992         | 1.61                   | [95-101]             | [-2.0; 3.6]                 | [98-105]                  | 3.80 ≤ 18.51                              | 3.0         | 10.0        |
| E2    | 5 | 25.1 – 100.6 | 0.9997         | 1.06                   | [93-100]             | [-1.6; 2.8]                 | [98-106]                  | 4.17 ≤ 18.51                              | 1.9         | 6.5         |
| EE2   | 5 | 25.2 – 100.8 | 0.9998         | 0.78                   | [89-103]             | [-1.3; 1.6]                 | [95-110]                  | 1.30 ≤ 18.51                              | 1.4         | 4.8         |
| DES   | 5 | 25.5 – 101.8 | 0.9996         | 1.20                   | [94-100]             | [-1.9; 3.2]                 | [98-105]                  | 2.18 ≤ 18.51                              | 2.2         | 7.4         |
| ERT   | 6 | 42.8 – 642.6 | 0.9977         | 5.22                   | [86-100]             | [-11; 7.1]                  | [92-107]                  | 3.00 ≤ 10.13                              | 39          | 129         |
| FLX   | 5 | 17.5 – 87.3  | 0.9993         | 1.80                   | [92-137]             | [-5.8; 7.6]                 | [78-116]                  | 0.11 ≤ 18.51                              | 2.6         | 8.7         |

**Table S4.** PhACs linearity range studies and respective instrumental analytical thresholds – high concentration range (reported LOD and LOQ for high linear range)

| PhACs | N  | C<br>µg/L     | r <sup>2</sup> | CV <sub>m</sub><br>(%) | Norm (%)<br>[85-115] | Residues<br>(%)<br>[85-115] | RIKILT (%)<br>[90-110] | Mandel test<br>PG ≤ F(0,05; 1; N-3) | LOD<br>µg/L | LOQ<br>µg/L |
|-------|----|---------------|----------------|------------------------|----------------------|-----------------------------|------------------------|-------------------------------------|-------------|-------------|
| ATN   | 7  | 171.2 – 748.8 | 0.9992         | 1.56                   | [95-113]             | [-2.6; 3.1]                 | [92-110]               | 1.88 ≤ 7.71                         | 20.4        | 68.2        |
| APAP  | 7  | 163.8 – 716.8 | 0.9989         | 1.84                   | [79-131]             | [-2.2; 2.8]                 | [80-132]               | 1.07 ≤ 7.71                         | 23.1        | 77.0        |
| SDZ   | 7  | 167.8 – 734.2 | 0.9992         | 1.56                   | [97-109]             | [-2.5; 2.9]                 | [95-107]               | 2.34 ≤ 7.71                         | 20.0        | 66.7        |
| SPD   | 7  | 168.9 – 738.7 | 0.9995         | 1.16                   | [91-111]             | [-2.3; 0.9]                 | [92-112]               | 2.91 ≤ 7.71                         | 15.0        | 50.1        |
| CAF   | 7  | 170.1 – 744.0 | 0.9991         | 1.63                   | [96-109]             | [-2.2; 2.2]                 | [95-107]               | 2.32 ≤ 7.71                         | 21.2        | 70.8        |
| SMX   | 7  | 168.0 – 734.9 | 0.9994         | 1.38                   | [98-106]             | [-2.2; 1.8]                 | [97-104]               | 0.88 ≤ 7.71                         | 17.8        | 59.3        |
| MTPL  | 7  | 166.3 – 727.7 | 0.9994         | 1.34                   | [88-115]             | [-2.3; 1.9]                 | [90-117]               | 1.85 ≤ 7.71                         | 17.0        | 56.7        |
| PPNL  | 7  | 163.2 – 714.1 | 0.9998         | 0.82                   | [87-109]             | [-0.7; 0.6]                 | [92-115]               | 2.94 ≤ 7.71                         | 10.3        | 34.2        |
| CTS   | 7  | 170.1 – 744.2 | 0.9994         | 1.34                   | [93-109]             | [-1.4; 1.3]                 | [93-110]               | 0.71 ≤ 7.71                         | 17.4        | 58.1        |
| CBZ   | 7  | 166.9 – 730.1 | 0.9999         | 0.63                   | [89-111]             | [-0.6; 1.1]                 | [92-115]               | 0.20 ≤ 7.71                         | 8.1         | 27.1        |
| CFA   | 7  | 165.1 – 722.2 | 0.9993         | 1.46                   | [94-106]             | [-2.1; 5.7]                 | [93-105]               | 0.88 ≤ 7.71                         | 18.4        | 61.4        |
| NPX   | 7  | 163.8 – 716.8 | 1.0000         | 0.34                   | [93-105]             | [-0.7; 1.1]                 | [96-108]               | 3.89 ≤ 7.71                         | 4.2         | 14.1        |
| GTD   | 7  | 167.0 – 730.7 | 0.9996         | 1.15                   | [95-109]             | [-3.1; 1.5]                 | [94-108]               | 1.63 ≤ 7.71                         | 14.7        | 49.1        |
| TTE   | 7  | 172.2 – 753.4 | 0.9995         | 1.27                   | [95-105]             | [-1.5; 1.1]                 | [97-106]               | 2.77 ≤ 7.71                         | 16.7        | 55.6        |
| BZF   | 7  | 110.8 – 664.6 | 0.9996         | 1.23                   | [95-104]             | [-1.1; 1.3]                 | [96-106]               | 0.16 ≤ 7.71                         | 13.2        | 44.2        |
| IBUP  | 7  | 107.6 – 645.8 | 0.9995         | 1.46                   | [96-100]             | [-2.7; 1.8]                 | [98-102]               | 0.45 ≤ 7.71                         | 15.3        | 50.9        |
| DCF   | 7  | 114.4 – 686.5 | 0.9990         | 1.94                   | [86-117]             | [-2.9; 1.6]                 | [88-119]               | 1.56 ≤ 7.71                         | 21.6        | 71.8        |
| E3    | 7  | 100.6 – 603.4 | 0.9996         | 1.32                   | [94-101]             | [-2.1; 3.4]                 | [96-104]               | 1.87 ≤ 7.71                         | 12.8        | 442.7       |
| E1    | 7  | 101.6 – 609.5 | 0.9998         | 0.98                   | [93-107]             | [-2.1; 1.6]                 | [94-109]               | 1.11 ≤ 7.71                         | 9.6         | 32.1        |
| E2    | 7  | 100.6 – 603.4 | 0.9994         | 1.51                   | [95-110]             | [-4.4; 1.9]                 | [94-108]               | 0.00 ≤ 7.71                         | 14.7        | 49.0        |
| EE2   | 7  | 100.8 – 604.8 | 0.9995         | 1.43                   | [89-109]             | [-2.7; 1.4]                 | [93-114]               | 3.46 ≤ 7.71                         | 13.9        | 46.4        |
| DES   | 7  | 101.8 – 611.0 | 0.9991         | 1.84                   | [92-104]             | [-1.4; 2.4]                 | [96-108]               | 0.85 ≤ 7.71                         | 18.2        | 60.5        |
| ERT   | -- | ---           | ---            | ---                    | ---                  | ---                         | ---                    | ---                                 | ---         | ---         |
| FLX   | 7  | 109.2 – 655.0 | 0.9994         | 1.75                   | [94-118]             | [-3.0; 3.1]                 | [87-109]               | 0.11 ≤ 7.71                         | 16.8        | 56.2        |

**Table S5.** Working range of standard addition calibration curve of PhACs in BEI WWI by SPE-UHPLC-MS/MS

| PhACs | N | C<br>µg/L | r <sup>2</sup> | CV <sub>m</sub><br>(%) | Norm (%)<br>[85-115] | Residues<br>(%)<br>[85-115] | RIKILT (%)<br>[90-110] | Mandel test<br>PG ≤ F(0,05; 1; N-3) |
|-------|---|-----------|----------------|------------------------|----------------------|-----------------------------|------------------------|-------------------------------------|
| ATN   | 6 | 1.6 – 9.6 | 0.9993         | 2.1                    | [99-110]             | [-8.7; 1.6]                 | [93-103]               | 5.49 ≤ 10.13                        |
| APAP  | 5 | 1.5 – 9.2 | 0.9998         | 0.59                   | [100-101]            | [-1.0; 0.5]                 | [99-100]               | 0.04 ≤ 18.51                        |
| SDZ   | 7 | 1.6 – 9.4 | 0.9988         | 1.7                    | [95-100]             | [-2.0; 3.0]                 | [98-103]               | 0.01 ≤ 7.71                         |
| SPD   | 6 | 1.5 – 9.2 | 0.9997         | 0.38                   | [100-101]            | [-0.5; 0.3]                 | [99-100]               | 0.00 ≤ 10.13                        |
| CAF   | 6 | 1.6 – 9.4 | 0.9998         | 0.56                   | [99-101]             | [-0.5; 0.6]                 | [100-101]              | 2.12 ≤ 10.13                        |
| SMX   | 7 | 1.6 – 9.6 | 0.9991         | 0.74                   | [98-100]             | [-0.9; 1.5]                 | [99-102]               | 4.51 ≤ 7.71                         |
| MTPL  | 7 | 1.6 – 9.4 | 0.9998         | 0.67                   | [99-102]             | [-1.2; 1.6]                 | [99-102]               | 0.16 ≤ 7.71                         |
| PPNL  | 7 | 1.6 – 9.3 | 0.9993         | 1.7                    | [95-102]             | [-2.2; 5.1]                 | [97-105]               | 0.00 ≤ 7.71                         |
| CTS   | 7 | 1.5 – 9.2 | 0.9975         | 2.2                    | [91-100]             | [-4.0; 5.1]                 | [96-105]               | 1.10 ≤ 7.71                         |
| CBZ   | 7 | 1.6 – 9.5 | 0.9990         | 0.79                   | [99-101]             | [-0.8; 0.9]                 | [99-101]               | 0.38 ≤ 7.71                         |
| CFA   | 7 | 9.3 – 56  | 0.9990         | 1.7                    | [95-104]             | [-4.0; 5.9]                 | [96-106]               | 0.14 ≤ 7.71                         |
| NPX   | 6 | 1.7 – 10  | 0.9993         | 1.5                    | [97-104]             | [-3.2; 3.6]                 | [97-103]               | 0.54 ≤ 10.13                        |
| GTD   | 6 | 1.6 – 9.7 | 0.9991         | 1.0                    | [98-100]             | [-0.8; 1.2]                 | [99-101]               | 0.25 ≤ 10.13                        |
| TTE   | 7 | 1.6 – 9.5 | 0.9988         | 2.2                    | [91-102]             | [-2.6; 10.1]                | [97-109]               | 1.60 ≤ 7.71                         |
| BZF   | 7 | 1.7 – 10  | 0.9974         | 1.2                    | [97-100]             | [-1.0; 2.1]                 | [99-102]               | 1.49 ≤ 7.71                         |
| IBUP  | 6 | 3.2 – 19  | 0.9994         | 1.3                    | [97-103]             | [-2.4; 3.5]                 | [97-103]               | 1.88 ≤ 10.13                        |
| DCF   | 6 | 1.7 – 10  | 0.9997         | 1.5                    | [100-103]            | [-1.2; 1.6]                 | [99-102]               | 1.51 ≤ 10.13                        |
| E3    | 7 | 8.6 – 51  | 0.9990         | 2.2                    | [98-104]             | [-3.3; 2.6]                 | [97-103]               | 0.26 ≤ 7.71                         |
| E1    | 7 | 8.7 – 52  | 0.9991         | 1.9                    | [97-101]             | [-1.7; 2.7]                 | [98-103]               | 0.22 ≤ 7.71                         |
| E2    | 7 | 9.4 – 57  | 0.9994         | 1.6                    | [94-104]             | [-3.6; 6.4]                 | [96-106]               | 0.21 ≤ 7.71                         |
| EE2   | 6 | 9.0 – 54  | 0.9984         | 2.7                    | [96-105]             | [-4.4; 4.2]                 | [95-105]               | 2.55 ≤ 10.13                        |
| DES   | 6 | 8.5 – 51  | 0.9993         | 1.7                    | [97-105]             | [-4.6; 3.6]                 | [95-101]               | 0.10 ≤ 10.13                        |
| ERT   | 5 | 1.6 – 9.6 | 0.9972         | 2.4                    | [100-106]            | [-3.0; 2.4]                 | [97-102]               | 0.13 ≤ 18.51                        |
| FLX   | 6 | 1.6 – 9.8 | 0.9992         | 3.10                   | [97-110]             | [-6.0; 5.9]                 | [93-105]               | 0.27 ≤ 10.13                        |

**Table S6.** Working range of standard addition calibration curve of PhACs in BEI WWE by SPE-UHPLC-MS/MS

| PhACs | N | C<br>µg/L | r <sup>2</sup> | CV <sub>m</sub><br>(%) | Norm (%)<br>[85-115] | Residues<br>(%)<br>[85-115] | RIKILT (%)<br>[90-110] | Mandel test<br>PG ≤ F(0,05; 1; N-3) |
|-------|---|-----------|----------------|------------------------|----------------------|-----------------------------|------------------------|-------------------------------------|
| ATN   | 7 | 1.6 – 9.6 | 0.9998         | 0.86                   | [96-100]             | [-1.1; 3.0]                 | [99-103]               | 1.67 ≤ 7.71                         |
| APAP  | 6 | 1.5 – 9.2 | 0.9998         | 0.94                   | [94-103]             | [-1.5; 1.1]                 | [96-105]               | 1.43 ≤ 10.13                        |
| SDZ   | 6 | 1.6 – 9.4 | 0.9997         | 1.3                    | [100-104]            | [-2.5; 1.8]                 | [97-101]               | 0.02 ≤ 10.13                        |
| SPD   | 7 | 1.5 – 9.2 | 0.9990         | 0.93                   | [99-101]             | [-1.3; 0.9]                 | [99-101]               | 0.02 ≤ 7.71                         |
| CAF   | 7 | 1.6 – 9.4 | 0.9996         | 1.4                    | [89-103]             | [-3.1; 9.7]                 | [96-110]               | 2.27 ≤ 7.71                         |
| SMX   | 7 | 1.6 – 9.6 | 0.9993         | 0.88                   | [100-102]            | [-1.1; 1.1]                 | [99-101]               | 0.02 ≤ 7.71                         |
| MTPL  | 7 | 1.6 – 9.4 | 0.9996         | 1.3                    | [98-105]             | [-2.7; 4.1]                 | [97-104]               | 0.00 ≤ 7.71                         |
| PPNL  | 6 | 1.6 – 9.3 | 0.9997         | 1.1                    | [98-103]             | [-1.5; 2.1]                 | [98-102]               | 0.05 ≤ 10.13                        |
| CTS   | 6 | 1.5 – 9.2 | 0.9996         | 1.4                    | [90-102]             | [-1.4; 2.3]                 | [95-108]               | 0.00 ≤ 10.13                        |
| CBZ   | 7 | 1.6 – 9.5 | 0.9995         | 0.51                   | [99-101]             | [-0.6; 1.0]                 | [99-101]               | 0.87 ≤ 7.71                         |
| CFA   | 6 | 9.3 – 56  | 0.9980         | 3.0                    | [94-102]             | [-3.4; 3.7]                 | [96-104]               | 0.63 ≤ 10.13                        |
| NPX   | 7 | 1.7 – 10  | 0.9997         | 1.2                    | [100-108]            | [-5.8; 1.6]                 | [94-102]               | 0.11 ≤ 7.71                         |
| GTD   | 6 | 1.6 – 9.7 | 0.9992         | 1.9                    | [87-103]             | [-3.1; 3.9]                 | [94-111]               | 0.20 ≤ 10.13                        |
| TTE   | 6 | 1.6 – 9.5 | 0.9996         | 1.4                    | [97-104]             | [-2.1; 3.3]                 | [96-104]               | 0.38 ≤ 10.13                        |
| BZF   | 7 | 1.7 – 10  | 0.9991         | 2.1                    | [90-101]             | [-2.5; 9.7]                 | [97-109]               | 0.16 ≤ 7.71                         |
| IBUP  | 6 | 3.2 – 19  | 0.9997         | 1.2                    | [96-103]             | [-1.8; 1.4]                 | [97-104]               | 0.12 ≤ 10.13                        |
| DCF   | 4 | 1.7 – 10  | 0.9987         | 3.1                    | [96-104]             | [-3.2; 3.8]                 | [96-104]               | 0.93 ≤ 161.5                        |
| E3    | 5 | 8.6 – 51  | 0.9997         | 1.37                   | [100-110]            | [-2.0; 2.2]                 | [94-103]               | 0.13 ≤ 18.51                        |
| E1    | 6 | 8.7 – 52  | 0.9993         | 1.8                    | [95-108]             | [-6.1; 4.6]                 | [92-104]               | 0.00 ≤ 10.13                        |
| E2    | 6 | 9.4 – 57  | 0.9988         | 2.3                    | [93-101]             | [-2.6; 5.9]                 | [97-106]               | 1.86 ≤ 10.13                        |
| EE2   | 6 | 9.0 – 54  | 0.9977         | 3.2                    | [100-109]            | [-4.6; 4.0]                 | [96-104]               | 1.16 ≤ 10.13                        |
| DES   | 5 | 8.5 – 51  | 0.9996         | 1.5                    | [98-109]             | [-5.0; 2.4]                 | [93-103]               | 0.45 ≤ 18.51                        |
| ERT   | 4 | 1.6 – 9.6 | 0.9991         | 2.6                    | [95-103]             | [-2.5; 6.2]                 | [97-105]               | 31.1 ≤ 161.5                        |
| FLX   | 6 | 1.6 – 9.8 | 0.9990         | 2.2                    | [100-105]            | [-3.4; 5.3]                 | [97-102]               | 2.75 ≤ 10.13                        |

**Table S7.** Working range of standard addition calibration curve of PhACs in FNw WWI by SPE-UHPLC-MS/MS

| PhACs | N | C<br>µg/L | r <sup>2</sup> | CV <sub>m</sub><br>(%) | Norm (%)<br>[85-115] | Residues<br>(%)<br>[85-115] | RIKILT (%)<br>[90-110] | Mandel test<br>PG ≤ F(0,05; 1; N-3) |
|-------|---|-----------|----------------|------------------------|----------------------|-----------------------------|------------------------|-------------------------------------|
| ATN   | 7 | 1.6 – 9.6 | 0.9989         | 0.80                   | [98 - 100]           | [-1.1; 1.1]                 | [99 - 101]             | 1.51 ≤ 7.71                         |
| APAP  | 5 | 1.5 – 9.2 | 0.9998         | 1.05                   | [99 - 102]           | [-1.2; 0.9]                 | [98 - 101]             | 4.61 ≤ 18.51                        |
| SDZ   | 6 | 1.6 – 9.4 | 0.9998         | 0.96                   | [97 - 100]           | [-1.4; 1.6]                 | [99 - 102]             | 0.05 ≤ 10.13                        |
| SPD   | 7 | 1.5 – 9.2 | 0.9984         | 1.37                   | [99 - 103]           | [-1.6; 2.3]                 | [98 - 102]             | 1.02 ≤ 7.71                         |
| CAF   | 6 | 1.6 – 9.4 | 0.9998         | 0.59                   | [99 - 100]           | [-0.9; 0.7]                 | [99 - 101]             | 0.87 ≤ 10.13                        |
| SMX   | 7 | 1.6 – 9.6 | 0.9992         | 0.67                   | [100 - 102]          | [-0.9; 0.9]                 | [99 - 101]             | 5.02 ≤ 7.71                         |
| MTPL  | 7 | 1.6 – 9.4 | 0.9999         | 0.59                   | [99 - 101]           | [-1.4; 0.8]                 | [99 - 101]             | 0.46 ≤ 7.71                         |
| PPNL  | 7 | 1.6 – 9.3 | 0.9987         | 2.19                   | [92 - 109]           | [-7.5; 3.5]                 | [93 - 104]             | 3.24 ≤ 7.71                         |
| CTS   | 6 | 1.5 – 9.2 | 0.9984         | 1.69                   | [98 - 108]           | [-2.1; 1.9]                 | [94 - 104]             | 3.13 ≤ 10.13                        |
| CBZ   | 6 | 1.6 – 9.5 | 0.9989         | 0.71                   | [100 - 102]          | [-0.7; 0.9]                 | [99 - 101]             | 2.69 ≤ 10.13                        |
| CFA   | 6 | 9.3 – 56  | 0.9992         | 1.84                   | [93 - 103]           | [-2.3; 1.9]                 | [96 - 106]             | 1.12 ≤ 10.13                        |
| NPX   | 6 | 1.7 – 10  | 0.9999         | 0.77                   | [98 - 101]           | [-1.3; 2.4]                 | [98 - 102]             | 6.14 ≤ 10.13                        |
| GTD   | 5 | 1.6 – 9.7 | 0.9991         | 2.19                   | [96 - 103]           | [-2.2; 2.8]                 | [97 - 104]             | 1.15 ≤ 18.51                        |
| TTE   | 6 | 1.6 – 9.5 | 0.9990         | 1.81                   | [100 - 109]          | [-3.0; 2.3]                 | [95 - 103]             | 0.39 ≤ 10.13                        |
| BZF   | 7 | 1.7 – 10  | 0.9987         | 1.31                   | [99 - 102]           | [-2.3; 1.4]                 | [98 - 101]             | 0.82 ≤ 7.71                         |
| IBUP  | 6 | 3.2 – 19  | 0.9989         | 2.23                   | [92 - 100]           | [-2.2; 6.3]                 | [97 - 106]             | 0.72 ≤ 10.13                        |
| DCF   | 5 | 1.7 – 10  | 0.9997         | 1.31                   | [97 - 104]           | [-4.8; 2.3]                 | [96 - 103]             | 1.07 ≤ 18.51                        |
| E3    | 7 | 8.6 – 51  | 0.9994         | 1.77                   | [97 - 105]           | [-3.2; 4.8]                 | [96 - 104]             | 0.04 ≤ 7.71                         |
| E1    | 7 | 8.7 – 52  | 0.9994         | 1.88                   | [88 - 100]           | [-2.5; 10.2]                | [96 - 109]             | 0.00 ≤ 7.71                         |
| E2    | 6 | 9.4 – 57  | 0.9989         | 2.13                   | [98 - 105]           | [-3.4; 3.8]                 | [97 - 104]             | 0.65 ≤ 10.13                        |
| EE2   | 5 | 9.0 – 54  | 0.9972         | 3.36                   | [100 - 108]          | [-3.6; 3.5]                 | [97 - 104]             | 0.02 ≤ 18.51                        |
| DES   | 6 | 8.5 – 51  | 0.9984         | 1.53                   | [95 - 100]           | [-1.5; 3.6]                 | [99 - 103]             | 2.06 ≤ 10.13                        |
| ERT   | 5 | 1.6 – 9.6 | 0.9975         | 3.34                   | [91 - 106]           | [-6.9; 8.1]                 | [93 - 108]             | 0.09 ≤ 18.51                        |
| FLX   | 6 | 1.6 – 9.8 | 0.9976         | 3.10                   | [97-110]             | [-6.0; 5.9]                 | [93-105]               | 0.27 ≤ 10.13                        |



**Table S8.** Working range of standard addition calibration curve of PhACs in FNw WWE by SPE-UHPLC-MS/MS

| PhACs | N | C<br>µg/L | r <sup>2</sup> | CV <sub>m</sub><br>(%) | Norm (%)<br>[85-115] | Residues<br>(%)<br>[85-115] | RIKILT (%)<br>[90-110] | Mandel test<br>PG ≤ F(0,05; 1; N-3) |
|-------|---|-----------|----------------|------------------------|----------------------|-----------------------------|------------------------|-------------------------------------|
| ATN   | 7 | 1.6 – 9.6 | 0.9995         | 1.2                    | [98-101]             | [-1.0; 2.1]                 | [99-102]               | 1.28 ≤ 7.71                         |
| APAP  | 7 | 1.5 – 9.2 | 0.9995         | 1.2                    | [95-101]             | [-2.5; 2.8]                 | [97-103]               | 0.00 ≤ 7.71                         |
| SDZ   | 7 | 1.6 – 9.4 | 1.0000         | 0.36                   | [99-100]             | [-0.6; 1.2]                 | [99-101]               | 2.22 ≤ 7.71                         |
| SPD   | 7 | 1.5 – 9.2 | 0.9997         | 1.1                    | [97-100]             | [-1.6; 2.0]                 | [98-102]               | 0.02 ≤ 7.71                         |
| CAF   | 7 | 1.6 – 9.4 | 0.9984         | 0.70                   | [99-100]             | [-0.8; 0.9]                 | [99-101]               | 1.38 ≤ 7.71                         |
| SMX   | 7 | 1.6 – 9.6 | 0.9992         | 1.4                    | [100-104]            | [-3.1; 1.7]                 | [97-102]               | 0.01 ≤ 7.71                         |
| MTPL  | 7 | 1.6 – 9.4 | 0.9996         | 1.3                    | [100-104]            | [-2.2; 1.8]                 | [98-102]               | 2.75 ≤ 7.71                         |
| PPNL  | 6 | 1.6 – 9.3 | 0.9976         | 3.1                    | [91-100]             | [-2.7; 6.7]                 | [97-106]               | 7.68 ≤ 10.13                        |
| CTS   | 6 | 1.5 – 9.2 | 0.9992         | 1.8                    | [100-105]            | [-2.5; 2.5]                 | [98-103]               | 0.72 ≤ 10.13                        |
| CBZ   | 7 | 1.6 – 9.5 | 0.9996         | 0.47                   | [100-101]            | [-0.5; 0.7]                 | [99-101]               | 0.12 ≤ 7.71                         |
| CFA   | 6 | 9.3 – 56  | 1.0000         | 0.46                   | [96-101]             | [-0.9; 1.0]                 | [98-104]               | 0.00 ≤ 10.13                        |
| NPX   | 7 | 1.7 – 10  | 0.9992         | 1.5                    | [99-103]             | [-2.0; 2.0]                 | [98-102]               | 1.22 ≤ 7.71                         |
| GTD   | 6 | 1.6 – 9.7 | 0.9981         | 2.9                    | [94-102]             | [-3.9; 4.1]                 | [96-104]               | 0.04 ≤ 10.13                        |
| TTE   | 5 | 1.6 – 9.5 | 0.9991         | 2.3                    | [93-103]             | [-3.1; 6.5]                 | [96-107]               | 6.79 ≤ 18.51                        |
| BZF   | 7 | 1.7 – 10  | 0.9996         | 1.4                    | [91-103]             | [-3.7; 8.8]                 | [96-108]               | 1.55 ≤ 7.71                         |
| IBUP  | 7 | 3.2 – 19  | 0.9984         | 3.1                    | [97-109]             | [-6.7; 4.7]                 | [94-105]               | 0.52 ≤ 7.71                         |
| DCF   | 4 | 1.7 – 10  | 0.9997         | 1.4                    | [98-102]             | [-3.3; 1.2]                 | [98-101]               | 22.7 ≤ 161.5                        |
| E3    | 6 | 8.6 – 51  | 0.9989         | 2.2                    | [100-104]            | [-2.8; 1.9]                 | [98-102]               | 3.13 ≤ 10.13                        |
| E1    | 6 | 8.7 – 52  | 0.9992         | 1.8                    | [95-105]             | [-2.1; 2.8]                 | [95-105]               | 8.98 ≤ 10.13                        |
| E2    | 6 | 9.4 – 57  | 0.9988         | 2.3                    | [97-108]             | [-4.6; 12.2]                | [93-104]               | 3.96 ≤ 10.13                        |
| EE2   | 6 | 9.0 – 54  | 0.9978         | 3.1                    | [94-109]             | [-6.7; 8.2]                 | [93-108]               | 0.10 ≤ 10.13                        |
| DES   | 6 | 8.5 – 51  | 0.9995         | 1.5                    | [99-103]             | [-2.2; 2.3]                 | [98-102]               | 0.07 ≤ 10.13                        |
| ERT   | 5 | 1.6 – 9.6 | 0.9993         | 1.3                    | [95-103]             | [-2.0; 2.5]                 | [97-105]               | 1.05 ≤ 18.51                        |
| FLX   | 5 | 1.6 – 9.8 | 0.9996         | 1.4                    | [89-101]             | [-1.2; 2.7]                 | [95-108]               | 3.65 ≤ 10.13                        |

**Table S9.** Limits of detection (LOD) and limits of quantification (LOQ) for target PhACS determined based on calibration curve and repeatability conditions for influent (BEI WWI) and effluent (BEI WWE) wastewaters of Beirolas WWTP

| PhAC | BEI WWI     |             |             |             | BEI WWE     |             |             |             |
|------|-------------|-------------|-------------|-------------|-------------|-------------|-------------|-------------|
|      | CaL curve   |             | Repeat      |             | CaL curve   |             | Repeat      |             |
|      | LOD<br>µg/L | LOQ<br>µg/L | LOD<br>µg/L | LOQ<br>µg/L | LOD<br>µg/L | LOQ<br>µg/L | LOD<br>µg/L | LOQ<br>µg/L |
| ATN  | 0.23        | 0.75        | 2.25        | 7.49        | 0.17        | 0.58        | 0.36        | 1.20        |
| APAP | 0.29        | 0.98        | ---         | ---         | 0.14        | 0.46        | 0.86        | 2.87        |
| SDZ  | 0.33        | 1.09        | 0.16        | 0.54        | 0.19        | 0.62        | 0.24        | 0.81        |
| SPD  | 0.47        | 1.57        | 1.77        | 5.91        | 0.33        | 1.11        | 0.85        | 2.82        |
| CAF  | 0.31        | 1.02        | ---         | ---         | 0.22        | 0.72        | ---         | ---         |
| SMX  | 0.41        | 1.37        | 1.91        | 6.31        | 0.29        | 0.97        | 0.68        | 2.27        |
| MTPL | 0.23        | 0.78        | 0.54        | 1.79        | 0.22        | 0.73        | 0.29        | 0.98        |
| PPNL | 0.19        | 0.64        | 0.44        | 1.47        | 0.17        | 0.56        | 1.02        | 3.39        |
| CTS  | 0.33        | 1.11        | 0.33        | 1.08        | 0.20        | 0.68        | 0.22        | 0.75        |
| CBZ  | 0.52        | 1.72        | 0.14        | 0.47        | 0.26        | 0.85        | 0.21        | 0.70        |
| CFA  | 0.71        | 2.38        | 0.79        | 2.62        | 2.64        | 8.80        | 4.55        | 15.16       |
| NPX  | 0.14        | 0.46        | ---         | ---         | 0.21        | 0.71        | 0.42        | 1.39        |
| GTD  | 0.26        | 0.85        | 0.32        | 1.07        | 0.28        | 0.95        | 0.41        | 1.37        |
| TTE  | 0.25        | 0.85        | 0.31        | 1.03        | 0.21        | 0.70        | 1.11        | 3.69        |
| BZF  | 0.35        | 1.17        | 0.09        | 0.31        | 0.34        | 1.13        | 0.17        | 0.59        |
| IBUP | 0.74        | 2.47        | 0.03        | 0.12        | 0.35        | 1.17        | 0.50        | 1.66        |
| DCF  | 0.18        | 0.61        | ---         | ---         | 0.52        | 1.72        | ---         | ---         |
| E3   | 2.42        | 8.08        | 0.61        | 2.05        | 1.01        | 3.36        | 0.98        | 3.28        |
| E1   | 1.64        | 5.46        | 2.42        | 8.05        | 1.44        | 4.79        | 1.61        | 5.36        |
| E2   | 2.06        | 6.85        | 4.24        | 14.13       | 2.06        | 6.86        | 3.39        | 11.31       |
| EE2  | 1.73        | 5.75        | 2.20        | 7.33        | 2.72        | 9.08        | 1.93        | 6.42        |
| DES  | 0.96        | 3.20        | 1.68        | 5.59        | 1.20        | 4.00        | 0.67        | 2.25        |
| ERT  | 0.53        | 1.77        | 0.32        | 1.07        | 0.35        | 1.18        | 0.48        | 1.60        |
| FLX  | 0.21        | 0.69        | ---         | ---         | 0.36        | 1.21        | 0.11        | 0.37        |

**Table S10.** Limits of detection (LOD) and limits of quantification (LOQ) for target PhACS determined based on calibration curve and repeatability conditions for influent (FNw WWI) and effluent (FNw WWE) wastewaters of Faro NW WWTP

| FNw WWI     |             |             |             | FNw WWE     |             |             |             |
|-------------|-------------|-------------|-------------|-------------|-------------|-------------|-------------|
| CaL curve   |             | Repeat      |             | CaL curve   |             | Repeat      |             |
| LOD<br>µg/L | LOQ<br>µg/L | LOD<br>µg/L | LOQ<br>µg/L | LOD<br>µg/L | LOQ<br>µg/L | LOD<br>µg/L | LOQ<br>µg/L |
| 0.36        | 1.20        | 0.58        | 1.94        | 0.24        | 0.81        | 0.33        | 1.09        |
| 0.16        | 0.54        | ---         | ---         | 0.24        | 0.80        | 0.31        | 1.04        |
| 0.16        | 0.52        | 0.29        | 0.95        | 0.05        | 0.18        | 0.71        | 2.38        |
| 0.43        | 1.43        | 0.63        | 2.11        | 0.19        | 0.64        | 0.91        | 3.02        |
| 0.15        | 0.50        | ---         | ---         | 0.43        | 1.43        | ---         | ---         |
| 0.30        | 1.01        | 0.39        | 1.30        | 0.30        | 1.01        | 0.75        | 2.50        |
| 0.11        | 0.38        | 0.44        | 1.46        | 0.21        | 0.70        | 0.34        | 1.13        |
| 0.39        | 1.31        | 0.17        | 0.57        | 0.43        | 1.42        | 0.32        | 1.08        |
| 0.34        | 1.14        | 0.82        | 2.73        | 0.28        | 0.93        | 0.40        | 1.34        |
| 0.34        | 1.13        | 0.23        | 0.76        | 0.22        | 0.73        | 0.03        | 0.11        |
| 1.62        | 5.40        | 1.72        | 5.74        | 0.40        | 1.33        | 2.89        | 9.64        |
| 0.16        | 0.52        | ---         | ---         | 0.33        | 1.09        | 0.74        | 2.46        |
| 0.35        | 1.18        | 0.31        | 1.05        | 0.45        | 1.50        | 0.23        | 0.76        |
| 0.32        | 1.08        | 0.43        | 1.44        | 0.35        | 1.15        | 0.63        | 2.09        |
| 0.41        | 1.37        | 0.40        | 1.33        | 0.22        | 0.74        | 0.54        | 1.82        |
| 0.84        | 2.81        | 0.43        | 1.44        | 0.89        | 2.98        | 0.63        | 2.09        |
| 0.23        | 0.75        | ---         | ---         | 0.22        | 0.75        | ---         | ---         |
| 1.44        | 4.81        | 0.46        | 1.54        | 1.77        | 5.90        | 0.40        | 1.32        |
| 1.50        | 5.01        | 0.89        | 2.97        | 1.51        | 5.03        | 0.69        | 2.29        |
| 2.01        | 6.71        | 0.66        | 2.18        | 2.04        | 6.79        | 0.70        | 2.33        |
| 2.36        | 7.87        | 1.16        | 3.86        | 2.70        | 9.01        | 0.89        | 2.97        |
| 1.31        | 4.38        | 0.74        | 2.46        | 1.21        | 4.02        | 1.88        | 6.28        |
| 0.58        | 1.92        | 0.09        | 0.29        | 0.26        | 0.86        | 0.24        | 0.81        |
| 0.45        | 1.51        | 0.32        | 1.07        | 0.22        | 0.73        | 0.77        | 2.58        |

**Table S11.** Absolute recovery of PhACs in influent and effluent wastewater of Beirolas WWTP by SPE-UHPLC-MS/MS

| Comp. | Conc. (ng/L) | BEI WWI              | BEI WWE    | Conc. (ng/L) | BEI WWI              | BEI WWE    |
|-------|--------------|----------------------|------------|--------------|----------------------|------------|
|       |              | Recovery, % (RSD, %) |            |              | Recovery, % (RSD, %) |            |
| ATN   | 53           | 158 (18)             | 74.8 (6.0) | 193          | 88.3 (8.9)           | 81.7 (4.4) |
| APAP  | 51           | ---                  | 60.9 (18)  | 184          | ---                  | 58.3 (3.9) |
| SDZ   | 52           | 32.6 (6.3)           | 75.8 (4.1) | 187          | 38.6 (4.3)           | 77.3 (5.4) |
| SPD   | 51           | 65.2 (36)            | 59.4 (19)  | 184          | 70.2 (18)            | 69.2 (5.4) |
| CAF   | 52           | 115 (3.2)            | 115(2.2)   | 189          | 109 (3.2)            | 115 (1.7)  |
| SMX   | 53           | 98.0 (24)            | 86.9 (9.9) | 191          | 90.5 (4.0)           | 90.0 (7.3) |
| MTPL  | 52           | 115 (6.0)            | 123 (3.1)  | 188          | 119 (1.9)            | 104 (14)   |
| PPNL  | 52           | 109 (3.7)            | 107 (5.9)  | 186          | 118 (2.2)            | 107 (4.3)  |
| CTS   | 51           | 40.4 (40)            | 70.9 (4.1) | 184          | 36.1 (36)            | 67.6 (4.6) |
| CBZ   | 53           | 102 (0.68)           | 102 (1.8)  | 190          | 100 (1.8)            | 100 (0.7)  |
| CFA   | 309          | 76.2 (2.2)           | 119 (8.3)  | 1111         | 78.9 (1.8)           | 122 (3.8)  |
| NPX   | 57           | 98.6 (2.8)           | 87.1 (5.6) | 204          | 104 (1.2)            | 92.1 (4.0) |
| GTD   | 54           | 93.4 (3.3)           | 96.8 (2.1) | 194          | 101 (2.0)            | 102 (1.5)  |
| TTE   | 53           | 28.3 (11)            | 73.9 (19)  | 189          | 34.5 (3.2)           | 47.7 (24)  |
| BZF   | 55           | 121 (14)             | 132 (4.2)  | 199          | 105 (4.0)            | 128 (2.3)  |
| IBUP  | 108          | 114 (2.2)            | 90.8 (3.1) | 387          | 121 (1.3)            | 98.0 (1.4) |
| DCF   | 57           | 141 (2.2)            | 139 (2.6)  | 206          | 147 (2.0)            | 129 (3.2)  |
| E3    | 289          | 83.0 (1.5)           | 89.4 (5.3) | 1039         | 79.8 (4.7)           | 84.2 (12)  |
| E1    | 286          | 45.6 (29)            | 45.2 (18)  | 1029         | 48.3 (17)            | 30.7 (30)  |
| E2    | 314          | 52.8 (29)            | 48.7 (17)  | 1131         | 52.6 (17)            | 35.6 (30)  |
| EE2   | 300          | 32.3 (35)            | 30.6 (30)  | 1080         | 35.6 (28)            | 22.9 (32)  |
| DES   | 283          | 91.8 (1.9)           | 86.2 (21)  | 1018         | 99.7 (13)            | 88.0 (16)  |
| ERT   | 54           | 233 (6.8)            | 140 (20)   | 193          | 340 (6.8)            | 222 (18)   |
| FLX   | 55           | 235 (11)             | 179 (15)   | 196          | 200 (7.2)            | 132 (17)   |

**Table S12.** Absolute recovery of PhACs in influent and effluent wastewater of Faro NW WWTP by SPE-UHPLC-MS/MS

| Comp. | Conc. (ng/L) | FNw WWI              | FNw WWE                 | Conc. (ng/L) | FNw WWI                 | FNw WWE                  |
|-------|--------------|----------------------|-------------------------|--------------|-------------------------|--------------------------|
|       |              | Recovery, % (RSD, %) |                         |              | Recovery, % (RSD, %)    |                          |
| ATN   | 53           | 22.3 (33)            | 22.2 (18)               | 193          | 32.4 (7.7)              | 33.3 (5.9)               |
| APAP  | 51           | 32.1 (8.3)           | 189 (2.6)               | 184          | 94.5 (4.0)              | 168 (4.4)                |
| SDZ   | 52           | 64.3 (5.7)           | 95.5 (9.6)              | 187          | 72.6 (4.8)              | 120 (8.2)                |
| SPD   | 51           | ---                  | 62.0 (19)               | 184          | 46.9 (6.7)              | 104 (6.2)                |
| CAF   | 52           | 121 (3.8)            | 108 (2.6)               | 189          | 114 (1.5)               | 104 (4.4)                |
| SMX   | 53           | ---                  | ---                     | 191          | 25.4 (11)               | 52.3 (9.9)               |
| MTPL  | 52           | 29.0 (19)            | ---                     | 188          | 46.7 (9.4)              | 33.2 (11)                |
| PPNL  | 52           | 95.0 (2.8)           | 98.2 (3.1)              | 186          | 125 (2.6)               | 103 (3.3)                |
| CTS   | 51           | 232 (4.6)            | 29.5 (18)               | 184          | 92.9 (4.5)              | 44.6 (7.1)               |
| CBZ   | 53           | 102 (1.2)            | 103 (0.40)              | 190          | 101 (0.70)              | 98.7 (4.1)               |
| CFA   | 309          | 59.8 (6.2)           | 59.6 (10)               | 1111         | 59.6 (4.2)              | 77.8 (6.3)               |
| NPX   | 57           | 97.3 (2.4)           | 27.8 (31)<br>97.9 (1.5) | 204          | 103 (1.2)               | 64.7 (8.3)<br>99.7 (4.8) |
| GTD   | 54           | 95.9 (2.6)           | 15.1 (19)<br>95.1 (3.8) | 194          | 18.6 (6.2)<br>103 (1.4) | 27.4 (11)<br>97.8 (4.5)  |
| TTE   | 53           | ---                  | 22.3 (36)<br>87.1 (1.5) | 189          | 21.6 (18)               | 40.2 (8.5)<br>94.3 (4.4) |
| BZF   | 55           | 102 (2.1)            | 49.6 (26)               | 199          | 78.6 (6.0)              | 70.2 (10)                |
| IBUP  | 108          | 108 (2.2)            | ---                     | 387          | 109 (3.5)               | 61.1 (26)                |
| DCF   | 57           | 163 (1.7)            | 155 (2.5)               | 206          | 167 (1.9)               | 147 (18)                 |
| E3    | 289          | 93.5 (8.5)           | 67.2 (7.1)              | 1039         | 97.1 (2.6)              | 93.4 (7.0)               |
| E1    | 286          | 38.7 (23)            | 50.9 (20)               | 1029         | 48.4 (15)               | 76.7 (13)                |
| E2    | 314          | 48.3 (9.0)           | 52.2 (17)               | 1131         | 57.3 (8.9)              | 75.0 (13)                |
| EE2   | 300          | 59.1 (20)            | 44.2 (31)               | 1080         | 61.0 (11)               | 68.3 (17)                |
| DES   | 283          | 85.1 (21)            | 84.7 (18)               | 1018         | 125 (5.1)               | 77.0 (15)                |
| ERT   | 54           | 197 (8.8)            | 141 (13)                | 193          | 74.5 (13)               | 166 (33)                 |
| FLX   | 55           | 109 (8.5)            | 117 (21)                | 196          | 312 (16)                | 76.5 (29)                |

**Table S13.** Precision of the SPE-UHPLC-MS/MS method at two concentration levels (n = 10) under repeatability conditions.

| PhAC | Low concentration range |            |            |            |            | High concentration range |            |            |            |            |
|------|-------------------------|------------|------------|------------|------------|--------------------------|------------|------------|------------|------------|
|      | Conc.<br>µg/L           | BEI<br>WWI | BEI<br>WWE | FNw<br>WWI | FNw<br>WWE | Conc.<br>µg/L            | BEI<br>WWI | BEI<br>WWE | FNw<br>WWI | FNw<br>WWE |
|      |                         | RSD (%)    |            |            |            |                          | RSD (%)    |            |            |            |
| ATN  | 53                      | 6.24       | 2.72       | 3.39       | 6.60       | 193                      | 4.64       | 3.34       | 2.91       | 4.40       |
| APAP | 51                      | 3.85       | 15.7       | 6.05       | 3.52       | 184                      | 4.12       | 3.74       | 6.99       | 2.66       |
| SDZ  | 52                      | 11.0       | 4.83       | 4.91       | 7.03       | 187                      | 4.84       | 5.63       | 4.63       | 7.60       |
| SPD  | 51                      | 5.33       | 2.63       | 3.29       | 3.30       | 184                      | 7.11       | 3.09       | 2.48       | 3.43       |
| CAF  | 52                      | 7.00       | 20.5       | 6.51       | 9.59       | 189                      | 5.44       | 2.31       | 4.90       | 12.3       |
| SMX  | 53                      | 3.95       | 1.65       | 2.43       | 3.56       | 191                      | 1.57       | 3.14       | 2.82       | 4.02       |
| MTPL | 52                      | 1.91       | 2.34       | 1.93       | 1.93       | 188                      | 1.61       | 11.1       | 6.55       | 6.50       |
| PPNL | 52                      | 12.0       | 13.2       | 22.8       | 15.3       | 186                      | 10.8       | 22.4       | 18.1       | 12.9       |
| CTS  | 51                      | 4.97       | 3.55       | 3.82       | 10.2       | 184                      | 4.31       | 4.39       | 3.97       | 6.21       |
| CBZ  | 53                      | 2.93       | 1.14       | 2.14       | 3.28       | 190                      | 1.77       | 4.27       | 2.80       | 4.22       |
| CFA  | 309                     | 1.96       | 7.52       | 5.26       | 7.65       | 1111                     | 1.73       | 3.67       | 4.03       | 5.82       |
| NPX  | 57                      | 1.62       | 2.69       | 3.39       | 4.11       | 204                      | 1.05       | 3.09       | 2.09       | 4.66       |
| GTD  | 54                      | 9.58       | 10.2       | 13.3       | 7.84       | 194                      | 5.93       | 19.9       | 4.60       | 8.90       |
| TTE  | 53                      | 6.45       | 16.1       | 5.49       | 14.7       | 189                      | 2.50       | 18.7       | 13.5       | 6.97       |
| BZF  | 55                      | 2.57       | 2.39       | 10.8       | 12.7       | 199                      | 1.50       | 1.9        | 3.50       | 8.59       |
| IBUP | 108                     | 1.15       | 2.64       | 20.3       | 19.0       | 387                      | 1.62       | 1.3        | 12.1       | 17.7       |
| *DCF | 57                      | ---        | ---        | ---        | ---        | 206                      | ---        | ---        | ---        | ---        |
| E3   | 289                     | 6.03       | 4.56       | 5.35       | 5.24       | 1039                     | 4.17       | 11.5       | 2.30       | 5.90       |
| E1   | 286                     | 20.8       | 13.6       | 12.4       | 10.6       | 1029                     | 15.2       | 19.9       | 13.0       | 11.4       |
| E2   | 314                     | 24.6       | 14.8       | 6.89       | 9.70       | 1131                     | 16.4       | 21.8       | 8.05       | 11.6       |
| EE2  | 300                     | 19.00      | 17.9       | 12.81      | 14.6       | 1080                     | 19.1       | 21.9       | 9.45       | 14.4       |
| DES  | 283                     | 11.5       | 12.1       | 15.2       | 12.2       | 1018                     | 11.5       | 20.8       | 20.4       | 16.4       |
| ERT  | 54                      | 11.2       | 19.0       | 3.98       | 7.75       | 193                      | 4.69       | 28.2       | 5.45       | 7.01       |
| FLX  | 55                      | 13.1       | 4.77       | 14.0       | 18.0       | 196                      | 15.6       | 20.2       | 22.1       | 20.4       |

**Table S14:** Individual uncertainty components and respective expanded uncertainty estimated in the analysis of the 24 PhACs in wastewater influents from Beirolas WWTP by SPE-UHPLC-MS/MS.

| PhAC | Bottom-up approach  |                    |                 |                    | Top-down approach |           |                    | Nordtest approach |                |                    |
|------|---------------------|--------------------|-----------------|--------------------|-------------------|-----------|--------------------|-------------------|----------------|--------------------|
|      | $u_{precision}$ (%) | $u_{standard}$ (%) | $u_{curve}$ (%) | $U$ (%)<br>$k = 2$ | $u_{Rw}$ (%)      | $U_b$ (%) | $U$ (%)<br>$k = 2$ | $u_{Rw}$ (%)      | $U_{bias}$ (%) | $U$ (%)<br>$k = 2$ |
| ATN  | 0.7                 | 2.7                | 4.7             | 10.8               | 2.8               | 8.3       | 17.5               | 2.8               | 3.9            | 9.5                |
| APAP | 0.7                 | 1.3                | 1.2             | 3.8                | 3.6               | 11.1      | 23.4               | 3.6               | 5.7            | 13.5               |
| SDZ  | 0.4                 | 2.3                | 1.0             | 5.0                | 1.0               | 3.8       | 7.8                | 1.0               | 2.5            | 5.4                |
| SPD  | 3.0                 | 2.3                | 4.9             | 12.4               | 5.8               | 14.7      | 31.6               | 5.8               | 5.9            | 16.5               |
| CAF  | 0.6                 | 1.4                | 7.1             | 14.5               | 1.0               | 3.3       | 6.9                | 1.0               | 1.7            | 3.9                |
| SMX  | 2.3                 | 1.7                | 3.6             | 9.3                | 4.4               | 13.3      | 28.1               | 4.4               | 4.7            | 12.9               |
| MTPL | 1.1                 | 4.6                | 3.0             | 5.6                | 1.1               | 5.7       | 11.7               | 1.1               | 4.8            | 9.8                |
| PPNL | 0.9                 | 4.5                | 1.5             | 9.7                | 1.1               | 5.7       | 11.7               | 1.1               | 4.8            | 9.9                |
| CTS  | 1.2                 | 2.5                | 8.8             | 18.4               | 1.3               | 4.7       | 9.8                | 1.3               | 2.8            | 6.3                |
| CBZ  | 1.4                 | 1.7                | -0.5            | 4.6                | 0.2               | 13.6      | 27.1               | 0.2               | 1.8            | 3.5                |
| CFA  | 1.6                 | 4.1                | 6.5             | 15.6               | 0.6               | 4.7       | 9.4                | 0.6               | 4.3            | 8.7                |
| NPX  | 1.1                 | 1.3                | 3.4             | 7.6                | 0.7               | 3.0       | 6.1                | 0.7               | 2.2            | 4.7                |
| GTD  | 1.3                 | 4.4                | 5.3             | 14.0               | 1.0               | 5.6       | 11.3               | 1.0               | 4.8            | 9.8                |
| TTE  | 1.1                 | 2.5                | 2.6             | 7.5                | 1.8               | 6.0       | 12.5               | 1.8               | 3.1            | 7.1                |
| BZF  | 4.9                 | 2.5                | 3.6             | 13.2               | 0.7               | 3.3       | 6.7                | 0.7               | 2.7            | 5.5                |
| IBUP | 1.0                 | 1.7                | 2.4             | 6.2                | 0.9               | 3.2       | 6.7                | 0.9               | 2.0            | 4.3                |
| DCF  | 1.0                 | 1.0                | 8.9             | 18.1               | 0.6               | 2.5       | 5.2                | 0.6               | 1.8            | 3.9                |
| E3   | 1.3                 | 4.4                | 4.5             | 12.7               | 1.8               | 7.2       | 14.9               | 1.8               | 4.7            | 10.1               |
| E1   | 1.5                 | 4.4                | 10.2            | 22.5               | 6.7               | 20.4      | 42.9               | 6.7               | 7.7            | 20.3               |
| E2   | 1.1                 | 4.3                | 5.6             | 14.3               | 5.3               | 14.7      | 31.3               | 5.3               | 6.9            | 17.4               |
| EE2  | 1.8                 | 4.6                | 6.0             | 15.4               | 7.2               | 22.0      | 46.3               | 7.2               | 8.4            | 22.1               |
| DES  | 1.6                 | 4.4                | 5.3             | 14.2               | 2.6               | 9.0       | 18.8               | 2.6               | 5.2            | 11.6               |
| ERT  | 1.6                 | 2.5                | 6.6             | 14.4               | 2.8               | 8.9       | 18.6               | 2.8               | 3.8            | 9.5                |
| FLX  | 1.9                 | 2.6                | 3.4             | 9.3                | 3.7               | 11.3      | 23.8               | 3.7               | 4.6            | 11.7               |

**Table S15:** Individual uncertainty components and respective expanded uncertainty estimated in the analysis of the 24 PhACs in wastewater effluents from Beirolas WWTP by SPE-UHPLC-MS/MS.

| PhAC | Bottom-up approach  |                    |                 |                    | Top-down approach |           |                    | Nordtest approach |                |                    |
|------|---------------------|--------------------|-----------------|--------------------|-------------------|-----------|--------------------|-------------------|----------------|--------------------|
|      | $u_{precision}$ (%) | $u_{standard}$ (%) | $u_{curve}$ (%) | $U$ (%)<br>$k = 2$ | $u_{Rw}$ (%)      | $U_b$ (%) | $U$ (%)<br>$k = 2$ | $u_{Rw}$ (%)      | $U_{bias}$ (%) | $U$ (%)<br>$k = 2$ |
| ATN  | 0.93                | 2.7                | 1.9             | 6.8                | 1.0               | 4.1       | 8.5                | 1.0               | 2.9            | 6.2                |
| APAP | 1.1                 | 2.1                | 1.3             | 5.5                | 4.3               | 13.1      | 27.6               | 4.3               | 5.1            | 13.3               |
| SDZ  | 0.2                 | 2.3                | 2.1             | 6.2                | 0.9               | 3.5       | 7.1                | 0.9               | 2.4            | 5.2                |
| SPD  | 0.6                 | 2.3                | 2.1             | 6.3                | 3.1               | 9.5       | 20                 | 3.1               | 3.4            | 9.2                |
| CAF  | 0.9                 | 1.4                | 10.5            | 21.3               | 0.7               | 2.5       | 5.1                | 0.7               | 1.5            | 3.3                |
| SMX  | 1.2                 | 1.7                | 1.0             | 4.7                | 1.6               | 5.2       | 10.8               | 1.6               | 2.4            | 5.7                |
| MTPL | 0.8                 | 4.6                | 1.8             | 10                 | 0.8               | 5.2       | 10.6               | 0.8               | 4.7            | 9.5                |
| PPNL | 1.0                 | 4.5                | 1.1             | 9.5                | 4.0               | 12.8      | 26.7               | 4.0               | 6.1            | 14.6               |
| CTS  | 1.2                 | 2.5                | 6.9             | 14.9               | 1.1               | 4.2       | 8.7                | 1.1               | 2.8            | 6.0                |
| CBZ  | 2.0                 | 1.7                | -1.3            | 5.9                | 0.2               | 13.6      | 27.1               | 0.2               | 1.8            | 3.5                |
| CFA  | 1.3                 | 4.1                | 7.2             | 16.7               | 2.8               | 9.3       | 19.4               | 2.8               | 5.1            | 11.6               |
| NPX  | 1.0                 | 2.1                | 0.4             | 4.7                | 1.6               | 5.3       | 11                 | 1.6               | 2.7            | 6.2                |
| GTD  | 0.9                 | 4.4                | 4.3             | 12.5               | 0.6               | 5.0       | 10.2               | 0.6               | 4.7            | 9.5                |
| TTE  | 0.5                 | 2.5                | 3.5             | 8.6                | 5.7               | 14.2      | 30.7               | 5.7               | 6.2            | 16.9               |
| BZF  | 0.9                 | 2.5                | 11.8            | 24.1               | 2.7               | 8.5       | 17.7               | 2.7               | 3.7            | 9.2                |
| IBUP | 1.4                 | 1.7                | 3.5             | 8.3                | 2.1               | 6.6       | 13.8               | 2.1               | 2.7            | 6.9                |
| DCF  | 1.0                 | 1.0                | 9.5             | 19.2               | 0.8               | 2.9       | 6.0                | 0.8               | 1.9            | 4.1                |
| E3   | 0.6                 | 4.4                | 4.4             | 12.5               | 1.5               | 6.2       | 12.8               | 1.5               | 4.6            | 9.7                |
| E1   | 0.8                 | 4.4                | 5.0             | 13.4               | 2.5               | 17.6      | 35.5               | 2.5               | 6.8            | 14.6               |
| E2   | 1.3                 | 4.3                | 5.1             | 13.5               | 5.8               | 18        | 37.9               | 5.8               | 7.3            | 18.7               |
| EE2  | 1.5                 | 4.6                | 6.8             | 16.6               | 6.7               | 19.6      | 41.4               | 6.7               | 8.1            | 21.0               |
| DES  | 1.3                 | 4.4                | 5.4             | 14.3               | 4.4               | 12.5      | 26.6               | 4.4               | 6.3            | 15.4               |
| ERT  | 1.4                 | 2.5                | 7.7             | 16.4               | 6.6               | 19.9      | 41.9               | 6.6               | 7.1            | 19.3               |
| FLX  | 1.2                 | 2.6                | 3.6             | 9.2                | 5.1               | 15.4      | 32.4               | 5.1               | 7.6            | 15.3               |



**Table S16:** Individual uncertainty components and respective expanded uncertainty estimated in the analysis of the 24 PhACs in wastewater influents from Faro NW WWTP by SPE-UHPLC-MS/MS.

| PhAC | Bottom-up approach  |                    |                 |                    | Top-down approach |           |                    | Nordtest approach |                |                    |
|------|---------------------|--------------------|-----------------|--------------------|-------------------|-----------|--------------------|-------------------|----------------|--------------------|
|      | $u_{precision}$ (%) | $u_{standard}$ (%) | $u_{curve}$ (%) | $U$ (%)<br>$k = 2$ | $u_{Rw}$ (%)      | $U_b$ (%) | $U$ (%)<br>$k = 2$ | $u_{Rw}$ (%)      | $U_{bias}$ (%) | $U$ (%)<br>$k = 2$ |
| ATN  | 4.47                | 2.7                | 10.9            | 24.2               | 0.7               | 3.5       | 7.2                | 0.7               | 2.8            | 5.8                |
| APAP | 1.1                 | 2.1                | 1.9             | 6.1                | 2.1               | 6.8       | 14.2               | 2.1               | 3.4            | 8.0                |
| SDZ  | 0.2                 | 2.3                | 6.9             | 14.6               | 1.3               | 4.5       | 9.4                | 1.3               | 2.6            | 5.9                |
| SPD  | 1.3                 | 2.3                | 15.9            | 32.2               | 5.8               | 15.3      | 32.8               | 5.8               | 5.9            | 16.5               |
| CAF  | 0.6                 | 1.4                | 9.6             | 19.4               | 1.3               | 4.2       | 8.8                | 1.3               | 1.9            | 4.6                |
| SMX  | 2.0                 | 1.7                | -7.3            | 15.5               | 0.7               | 2.6       | 5.4                | 0.7               | 1.8            | 3.9                |
| MTPL | 2.9                 | 4.6                | 0.6             | 11                 | 2.9               | 9.4       | 19.7               | 2.9               | 5.5            | 12.4               |
| PPNL | 1.1                 | 4.5                | 0.6             | 9.4                | 0.9               | 18.5      | 37.1               | 0.9               | 4.8            | 9.7                |
| CTS  | 1.0                 | 2.5                | 3.2             | 8.3                | 1.3               | 4.7       | 9.8                | 1.3               | 2.8            | 6.3                |
| CBZ  | 1.2                 | 1.7                | 7.5             | 15.6               | 0.4               | 2.1       | 4.2                | 0.4               | 1.8            | 3.6                |
| CFA  | 1.6                 | 4.1                | 5.3             | 13.7               | 1.6               | 6.4       | 13.1               | 1.6               | 4.6            | 9.6                |
| NPX  | 1.1                 | 1.3                | 3.4             | 7.6                | 0.8               | 3.1       | 6.5                | 0.8               | 2.3            | 4.8                |
| GTD  | 1.3                 | 2.7                | 3.6             | 9.2                | 0.8               | 5.3       | 10.6               | 0.8               | 4.8            | 9.7                |
| TTE  | 1.3                 | 2.5                | 4.3             | 10.2               | 1.6               | 5.4       | 11.3               | 1.6               | 2.9            | 6.7                |
| BZF  | 1.4                 | 2.5                | 8.1             | 17.2               | 0.6               | 3.1       | 6.4                | 0.6               | 2.7            | 5.5                |
| IBUP | 1.0                 | 1.7                | 2.4             | 6.2                | 0.7               | 2.8       | 5.7                | 0.7               | 1.9            | 4.1                |
| DCF  | 1.0                 | 1.0                | 8.0             | 16.2               | 0.5               | 2.3       | 4.7                | 0.5               | 1.8            | 3.8                |
| E3   | 1.3                 | 4.4                | 0.6             | 9.2                | 1.9               | 7.2       | 14.9               | 1.9               | 4.8            | 10.3               |
| E1   | 1.6                 | 4.4                | 4.9             | 13.6               | 3.0               | .9        | 18.7               | 3.0               | 4.8            | 11.4               |
| E2   | 1.1                 | 4.3                | 15.0            | 31.4               | 2.1               | 7.6       | 15.8               | 2.1               | 4.9            | 10.6               |
| EE2  | 1.7                 | 4.6                | 5.5             | 14.8               | 2.3               | 7.4       | 15.5               | 2.3               | 5.0            | 10.9               |
| DES  | 1.2                 | 4.4                | 3.4             | 11.4               | 3.5               | 10.2      | 21.6               | 3.5               | 5.7            | 13.3               |
| ERT  | 1.4                 | 2.5                | 4.2             | 10.3               | 1.8               | 5.4       | 11.3               | 1.8               | 3.1            | 7.2                |
| FLX  | 1.4                 | 2.6                | 9.9             | 20.6               | 1.7               | 5.7       | 11.9               | 1.7               | 3.2            | 7.2                |

**Table S17:** Individual uncertainty components and respective expanded uncertainty estimated in the analysis of the 24 PhACs in wastewater effluents from Faro Nw WWTP by SPE-UHPLC-MS/MS.

| PhAC | Bottom-up approach  |                    |                 |                    | Top-down approach |           |                    | Nordtest approach |                |                    |
|------|---------------------|--------------------|-----------------|--------------------|-------------------|-----------|--------------------|-------------------|----------------|--------------------|
|      | $u_{precision}$ (%) | $u_{standard}$ (%) | $u_{curve}$ (%) | $U$ (%)<br>$k = 2$ | $u_{Rw}$ (%)      | $U_b$ (%) | $U$ (%)<br>$k = 2$ | $u_{Rw}$ (%)      | $U_{bias}$ (%) | $U$ (%)<br>$k = 2$ |
| ATN  | 1.0                 | 2.7                | 5.1             | 11.6               | 0.6               | 3.2       | 6.6                | 0.6               | 2.8            | 5.7                |
| APAP | 1.4                 | 2.1                | 11.6            | 23.7               | 1.3               | 4.8       | 9.9                | 1.3               | 3.0            | 6.5                |
| SDZ  | 0.2                 | 2.3                | 3.9             | 9.0                | 3.3               | 10.2      | 21.4               | 3.3               | 4.0            | 10.4               |
| SPD  | 1.3                 | 2.3                | 3.3             | 8.5                | 4.2               | 12.5      | 26.4               | 4.2               | 4.3            | 12                 |
| CAF  | 1.7                 | 1.4                | 3.5             | 8.3                | 0.7               | 2.6       | 5.4                | 0.7               | 1.5            | 3.4                |
| SMX  | 0.8                 | 1.7                | -7.5            | 15.5               | 0.6               | 2.5       | 5.2                | 0.6               | 1.8            | 3.9                |
| MTPL | 1.2                 | 4.6                | 0.9             | 9.7                | 1.2               | 5.9       | 12.1               | 1.2               | 4.8            | 9.9                |
| PPNL | 0.6                 | 4.5                | 1.7             | 9.8                | 1.2               | 6.0       | 12.2               | 1.2               | 4.8            | 10.0               |
| CTS  | 1.5                 | 2.5                | 1.7             | 6.7                | 1.3               | 4.6       | 9.7                | 1.3               | 2.8            | 6.2                |
| CBZ  | 1.8                 | 1.7                | 1.4             | 5.7                | 0.1               | 13.7      | 27.3               | 0.1               | 1.7            | 3.5                |
| CFA  | 1.6                 | 4.1                | 3.8             | 11.6               | 2.1               | 7.6       | 15.8               | 2.1               | 4.8            | 10.4               |
| NPX  | 1.1                 | 2.1                | 1.4             | 5.5                | 0.4               | 2.5       | 5.0                | 0.4               | 2.2            | 4.4                |
| GTD  | 0.9                 | 4.4                | 2.2             | 10.0               | 1.1               | 5.8       | 11.8               | 1.1               | 4.8            | 9.9                |
| TTE  | 1.3                 | 2.5                | 2.8             | 7.9                | 0.4               | 2.7       | 5.5                | 0.4               | 2.5            | 5.0                |
| BZF  | 1.3                 | 2.5                | 4.3             | 10.3               | 0.5               | 3.0       | 6.0                | 0.5               | 2.6            | 5.4                |
| IBUP | 1.6                 | 1.7                | 1.7             | 5.7                | 0.7               | 2.8       | 5.8                | 0.7               | 1.9            | 4.1                |
| DCF  | 5.3                 | 10.4               | 0.3             | 10.9               | 0.7               | 2.7       | 5.6                | 0.7               | 1.9            | 2.0                |
| E3   | 1.4                 | 4.4                | 1.8             | 9.8                | 3.1               | 10.2      | 21.3               | 3.1               | 5.3            | 12.3               |
| E1   | 1.3                 | 4.4                | 2.5             | 10.4               | 3.5               | 11.1      | 23.3               | 3.5               | 5.1            | 12.4               |
| E2   | 1.9                 | 4.3                | 4.6             | 13.1               | 3.1               | 10.2      | 21.3               | 3.1               | 5.4            | 12.4               |
| EE2  | 1.3                 | 4.6                | 5.1             | 13.9               | 4.5               | 14.1      | 29.7               | 4.5               | 6.3            | 15.4               |
| DES  | 1.3                 | 4.4                | 9.8             | 21.7               | 5.3               | 16.4      | 34.5               | 5.3               | 6.9            | 17.4               |
| ERT  | 1.3                 | 2.5                | 13.9            | 28.4               | 4.5               | 13.9      | 29.2               | 4.5               | 5.2            | 13.8               |
| FLX  | 1.4                 | 2.6                | 6.5             | 14.3               | 6.3               | 19.1      | 40.2               | 6.3               | 68             | 18.2               |
